# Supplementary material for: Metabolomic Profiling and Biological Activities of Pleurotus columbinus Quél. Cultivated on Different Agri-Food Byproducts
Source: MDPI journal article supplement (doi:10.3390/antibiotics10101245), 2021-10-14
Supplement: s1 [file s1]

**Table S1.** *P. columbinus* metabolites identified by untargeted HPLC-MS analysis.

| Metabolite name                             | KEGG   | HMDB        | PubChem | ChEBI | METLIN |
|---------------------------------------------|--------|-------------|---------|-------|--------|
| <b>amino acids pathway</b>                  |        |             |         |       |        |
| L-Alanine                                   | C00041 | HMDB0000161 | 5950    | 16977 | NA     |
| L-Lysine                                    | C00047 | HMDB0000182 | 5962    | 18019 | 5200   |
| L-Arginine                                  | C00062 | HMDB0000517 | 6322    | 16467 | 5502   |
| L-Glutamine                                 | C00064 | HMDB0000641 | 5961    | 18050 | 5614   |
| L-Serine                                    | C00065 | HMDB0000187 | 5951    | 17115 | 5203   |
| L-Methionine                                | C00073 | HMDB0000696 | 6137    | 16643 | 5664   |
| Ornithine                                   | C00077 | HMDB0000214 | 6262    | 15729 | 27     |
| L-Phenylalanine                             | C00079 | HMDB0000159 | 6140    | 17295 | 28     |
| L-Tyrosine                                  | C00082 | HMDB0000158 | 6057    | 17895 | 34     |
| L-Leucine                                   | C00123 | HMDB0000687 | 6106    | 15603 | 24     |
| L-Histidine                                 | C00135 | HMDB0000177 | 6274    | 15971 | 21     |
| L-Proline                                   | C00148 | HMDB0000162 | 145742  | 17203 | 29     |
| L-Asparagine                                | C00152 | HMDB0000168 | 6267    | 17196 | 14     |
| L-Valine                                    | C00183 | HMDB0000883 | 6287    | 16414 | 5842   |
| L-Threonine                                 | C00188 | HMDB0000167 | 6288    | 16857 | 32     |
| L-Glutamic acid                             | C00025 | HMDB0000148 | 33032   | 16015 | 5174   |
| L-Aspartic acid                             | C00049 | HMDB0000191 | 5960    | 17053 | 5206   |
| L-Homocysteine                              | C00155 | HMDB0000742 | 91552   | 17588 | 3256   |
| Citrulline                                  | C00327 | HMDB0000904 | 9750    | 16349 | 16     |
| L-Cystine                                   | C00491 | HMDB0000192 | 67678   | 16283 | 5207   |
| <b>Modified aminoacids</b>                  |        |             |         |       |        |
| 5-Hydroxy-L-tryptophan                      | C00643 | HMDB0000472 | 439280  | 17780 | NA     |
| L-Histidinol phosphate                      | C01100 | METPA0128   | NA      | 16996 | NA     |
| L-Glutamic acid 5-phosphate                 | C03287 | HMDB0001228 | 193475  | 17798 | 6093   |
| Methionine sulfoxide                        | C02989 | HMDB0002005 | 158980  | 17016 | 6428   |
| N-Acetylglutamic acid                       | C00624 | HMDB0001138 | 70914   | 17533 | 6031   |
| 4-Acetamidobutanoic acid                    | C02946 | HMDB0003681 | 18189   | 17645 | NA     |
| Argininosuccinic acid                       | C03406 | HMDB0000052 | 16950   | 15682 | 5115   |
| gamma-Glutamyl-beta-amino<br>npropionitrile | C06114 | HMDB0060477 | 440920  | 28092 | NA     |
| <b>Fatty acids pathway</b>                  |        |             |         |       |        |
| Palmitic acid                               | C00249 | HMDB0000220 | 985     | 15756 | 187    |
| Stearic acid                                | C01530 | HMDB0000827 | 5281    | 28842 | 189    |
| Oleic acid                                  | C00712 | HMDB0000207 | 445639  | 16196 | 190    |
| Gamma-Linolenic acid                        | C06426 | HMDB0003073 | 5280933 | 28661 | 386    |
| Docosahexaenoic acid                        | C06429 | HMDB0002183 | 445580  | 28125 | 3457   |
| 8,11,14-Eicosatrienoic acid                 | C03242 | HMDB0002925 | 5280581 | 53486 | 259    |
| <b>Vitamins pathway</b>                     |        |             |         |       |        |
| Riboflavin                                  | C00255 | HMDB0000244 | 493570  | 17015 | 5249   |
| Biotin                                      | C00120 | HMDB0000030 | 171548  | 15956 | 243    |
| Thiamine                                    | C00378 | HMDB0000235 | 1130    | 18385 | 5242   |
| Thiamine monophosphate                      | C01081 | HMDB0002666 | 3382778 | 37574 | 3488   |
| Thiamine pyrophosphate                      | C00068 | HMDB0001372 | 1132    | 9532  | 2832   |
| Folic acid                                  | C00504 | HMDB0000121 | 6037    | 27470 | 246    |
| 5,10-Methylene-THF                          | C00143 | HMDB0001533 | 439175  | 15636 | 6304   |
| N10-Formyl-THF                              | C00234 | HMDB0000972 | 1,4E+08 | 15637 | 5912   |
| Tetrahydrofolic acid                        | C00101 | HMDB0001846 | 91443   | 20506 | 714    |

|                                         |                               |                               |                               |                               |                               |
|-----------------------------------------|-------------------------------|-------------------------------|-------------------------------|-------------------------------|-------------------------------|
| <b>5-Methyltetrahydrofolate pathway</b> | C00440                        | HMDB0001396                   | 439234                        | 15641                         | 6215                          |
| THF-L-glutamate                         | C09332                        | HMDB0006825                   | 442163                        | 28624                         | NA                            |
| Pantothenic acid                        | C00864                        | HMDB0000210                   | 6613                          | 46905                         | NA                            |
| Nicotinic acid mononucleotide           | C01185                        | HMDB0001132                   | 5,3E+07                       | 15763                         | 6026                          |
| Nicotinamide riboside                   | C03150                        | HMDB0000855                   | 439924                        | 15927                         | 5818                          |
| Pyridoxine                              | C00314                        | HMDB0000239                   | 1054                          | 16709                         | 5245                          |
| Pyridoxamine 5'-phosphate               | C00647                        | HMDB0001555                   | 1053                          | 18335                         | NA                            |
| <b>Modified vitamins</b>                |                               |                               |                               |                               |                               |
| Dethiobiotin                            | C01909                        | HMDB0003581                   | 445027                        | 42280                         | 3351                          |
| <b>Monosaccharides pathway</b>          |                               |                               |                               |                               |                               |
| D-Glucose                               | C00031                        | NA                            | NA                            | NA                            | NA                            |
| D-Ribose                                | C00121                        | HMDB0000283                   | 5779                          | 47013                         | 313                           |
| <b>Oligosaccharides pathway</b>         |                               |                               |                               |                               |                               |
| Raffinose                               | C00492                        | HMDB0003213                   | 439242                        | 16634                         | 138                           |
| Stachyose                               | C01613                        | HMDB0003553                   | 439531                        | 17164                         | 6951                          |
| Sucrose                                 | C00089                        | HMDB0000258                   | 5988                          | 17992                         | 137                           |
| Trehalose 6-phosphate                   | C00689                        | HMDB0001124                   | 122336                        | 18283                         | 6019                          |
| <b>Sugar acids pathway</b>              |                               |                               |                               |                               |                               |
| Glucuronic acid                         | C00257                        | HMDB0000625                   | 10690                         | 33198                         | 345                           |
| <b>Modified polysaccharides pathway</b> |                               |                               |                               |                               |                               |
| (GlcNAc)2 (Man)2 (PP-Dol)1              | (GlcNAc)2 (Man)2 (PP-Dol)1    | (GlcNAc)2 (Man)2 (PP-Dol)1    | (GlcNAc)2 (Man)2 (PP-Dol)1    | (GlcNAc)2 (Man)2 (PP-Dol)1    | (GlcNAc)2 (Man)2 (PP-Dol)1    |
| (GlcNAc)2 (Man)3 (PP-Dol)1              | (GlcNAc)2 (Man)3 (PP-Dol)1    | (GlcNAc)2 (Man)3 (PP-Dol)1    | (GlcNAc)2 (Man)3 (PP-Dol)1    | (GlcNAc)2 (Man)3 (PP-Dol)1    | (GlcNAc)2 (Man)3 (PP-Dol)1    |
| (GlcN)1 (Ino(acyl)-P)1 (Man)1           | (GlcN)1 (Ino(acyl)-P)1 (Man)1 | (GlcN)1 (Ino(acyl)-P)1 (Man)1 | (GlcN)1 (Ino(acyl)-P)1 (Man)1 | (GlcN)1 (Ino(acyl)-P)1 (Man)1 | (GlcN)1 (Ino(acyl)-P)1 (Man)1 |
| (GlcN)1 (Ino(acyl)-P)1 (Man)2           | (GlcN)1 (Ino(acyl)-P)1 (Man)2 | (GlcN)1 (Ino(acyl)-P)1 (Man)2 | (GlcN)1 (Ino(acyl)-P)1 (Man)2 | (GlcN)1 (Ino(acyl)-P)1 (Man)2 | (GlcN)1 (Ino(acyl)-P)1 (Man)2 |
| <b>Shikimate pathway</b>                |                               |                               |                               |                               |                               |
| Shikimic acid                           | C00493                        | HMDB0003070                   | 8742                          | 16119                         | 338                           |
| Shikimate 3-phosphate                   | C03175                        | METPA0369                     | NA                            | 17052                         | NA                            |
| 3-Dehydroquinate                        | C00944                        | HMDB0012710                   | 439351                        | 17947                         | NA                            |
| 4-Amino-4-deoxychorismate               | C11355                        | METPA0993                     | NA                            | 18198                         | NA                            |
| <b>Mevalonate pathway</b>               |                               |                               |                               |                               |                               |
| Acetoacetyl-CoA                         | C00332                        | HMDB0001484                   | 439214                        | 15345                         | 449                           |
| Geranylgeranyl-PP                       | C00353                        | HMDB0004486                   | 447277                        | 48861                         | NA                            |
| Mevalonic acid-5P                       | C01107                        | HMDB0001343                   | 439400                        | 17436                         | 6177                          |
| Farnesol                                | C06081                        | HMDB0004305                   | 445070                        | 16619                         | 7048                          |
| (+)-7-Isojasmonic acid CoA              | C16339                        | HMDB0060298                   | 7,1E+07                       | NA                            | NA                            |
| All-trans-hexaprenyl diphosphate        | C01230                        | HMDB0012188                   | 5280413                       | 17528                         | NA                            |
| <b>Glycolytic pathway</b>               |                               |                               |                               |                               |                               |
| Pyruvic acid                            | C00022                        | HMDB0000243                   | 1060                          | 32816                         | 117                           |
| Fructose 6-phosphate                    | C00085                        | HMDB0000124                   | 69507                         | 15946                         | 5159                          |
| Dihydroxyacetone phosphate              | C00111                        | HMDB0001473                   | 668                           | 16108                         | 6262                          |
| Glyceric acid 1,3-biphosphate           | C00236                        | HMDB0001270                   | 439191                        | 16001                         | NA                            |
| Dolichol b-D-glucosyl phosphate         | C01246                        | HMDB0001054                   | 2,3E+07                       | 15812                         | 5969                          |
| Uridine diphosphate glucose             | C00029                        | HMDB0000286                   | 8629                          | 46229                         | 5278                          |

|                                                       |        |             |         |       |      |
|-------------------------------------------------------|--------|-------------|---------|-------|------|
| 3-Phosphoglycerate                                    | C00197 | NA          | NA      | NA    | NA   |
| <b>Pentose phosphate pathway</b>                      |        |             |         |       |      |
| Ribose 5-phosphate                                    | C00117 | NA          | NA      | NA    | NA   |
| Phosphoribosyl pyrophosphate                          | C00119 | HMDB0000280 | 7339    | 17111 | 5274 |
| Deoxyribose 5-phosphate                               | C00673 | HMDB0001031 | 4,6E+07 | 16132 | 5956 |
| <b>Calvin cycle</b>                                   |        |             |         |       |      |
| 3-Phosphoglycerate                                    | C00197 | NA          | NA      | NA    | NA   |
| <b>Mannose pathway</b>                                |        |             |         |       |      |
| Dolichol phosphate D-mannose                          | G10617 | NA          | NA      | NA    | NA   |
| Guanosine diphosphate mannose                         | C00096 | HMDB0001163 | 18396   | 15820 | 6045 |
| <b>Biosynthesis of Triacylglycerols</b>               |        |             |         |       |      |
| Glycerol 3-phosphate                                  | C00093 | HMDB0000126 | 439162  | 15978 | 5161 |
| <b>Tricarboxylic acid cycle</b>                       |        |             |         |       |      |
| Citric acid                                           | C00158 | HMDB0000094 | 311     | 30769 | 124  |
| <b>Glyoxylate cycle</b>                               |        |             |         |       |      |
| cis-Aconitic acid                                     | C00417 | HMDB0000072 | 643757  | 32805 | 5130 |
| <b>Purine methabolism</b>                             |        |             |         |       |      |
| Hypoxanthine                                          | C00262 | HMDB0000157 | 790     | 17368 | 83   |
| Xanthylic acid                                        | C00655 | HMDB0001554 | 73323   | 15652 | NA   |
| SAICAR                                                | C04823 | HMDB0000797 | 160666  | 18319 | 5762 |
| <b>Nucleotide biosynthesis</b>                        |        |             |         |       |      |
| Guanine                                               | C00242 | HMDB0000132 | 764     | 16235 | 315  |
| Cytosine                                              | C00380 | HMDB0000630 | 597     | 16040 | 283  |
| 5-Methylcytosine                                      | C02376 | HMDB0002894 | 65040   | 27551 | 3247 |
| Uracil                                                | C00106 | HMDB0000300 | 1174    | 17568 | 258  |
| Adenosine                                             | C00212 | HMDB0000050 | 60961   | 16335 | 86   |
| Deoxyadenosine monophosphate                          | C00360 | HMDB0000905 | 12599   | 17713 | 3461 |
| ADP                                                   | C00008 | HMDB0001341 | 6022    | 16761 | 6175 |
| dADP                                                  | C00206 | HMDB0001508 | 5,3E+07 | 16174 | 6286 |
| Deoxyadenosine                                        | C00559 | HMDB0000101 | 13730   | 17256 | 3382 |
| Uridine                                               | C00299 | HMDB0000296 | 6029    | 16704 | 90   |
| Uridine 5'-diphosphate                                | C00015 | HMDB0000295 | 6031    | 17659 | NA   |
| Uridine diphosphate-N-acetylglu-<br>cosamine          | C00043 | HMDB0000290 | 445675  | 16264 | 5281 |
| Uridine 5'-monophosphate                              | C00105 | HMDB0000288 | 6030    | 16695 | NA   |
| Deoxyuridine                                          | C00526 | HMDB0000012 | 13712   | 16450 | 5086 |
| Cytidine                                              | C00475 | HMDB0000089 | 6253    | 17562 | 3376 |
| Cytidine monophosphate                                | C00055 | HMDB0000095 | 6131    | 17361 | 5143 |
| Guanosine monophosphate                               | C00144 | HMDB0001397 | 6804    | 17345 | 6216 |
| Adenosine phosphosulfate                              | C00224 | HMDB0001003 | 10238   | 17709 | 5933 |
| dCMP                                                  | C00239 | HMDB0001202 | 13945   | 15918 | 6078 |
| Deoxyadenosine monophosphate                          | C00360 | HMDB0000905 | 12599   | 17713 | 3461 |
| dTDP                                                  | C00363 | HMDB0001274 | 164628  | 18075 | 6129 |
| Cyclic GMP                                            | C00942 | HMDB0001314 | 24316   | 16356 | 6152 |
| Diadenosine tetraphosphate                            | C01260 | HMDB0001211 | 21706   | 17422 | NA   |
| Inosine                                               | C00294 | HMDB0000195 | 6021    | 17596 | 84   |
| Deoxyuridine triphosphate                             | C00460 | HMDB0001191 | 65070   | 17625 | 6069 |
| <b>hydroxylation of phenylalanine<br/>to tyrosine</b> |        |             |         |       |      |
| 4a-Carbinolamine tetrahydrobiop-<br>terin             | C00268 | HMDB0002215 | 1,4E+08 | 43120 | 6552 |
| Tetrahydrobiopterin                                   | C00272 | HMDB0000027 | 44257   | 59560 | 5098 |

**pathway of structural phospho-lipids**

|                                                                                     |        |             |         |        |      |
|-------------------------------------------------------------------------------------|--------|-------------|---------|--------|------|
| Citicoline                                                                          | C00307 | HMDB0001413 | 13804   | 16436  | 6229 |
| <b>Aminoacids pathway</b>                                                           |        |             |         |        |      |
| N-Acetylmethionine                                                                  | C00437 | HMDB0003357 | 439232  | 16543  | NA   |
| O-Phosphomethionine                                                                 | C01102 | HMDB0003484 | 151187  | 15961  | NA   |
| N-Acetyl-L-glutamate 5-semialdehyde                                                 | C01250 | HMDB0006488 | 192878  | 16319  | NA   |
| 4-Hydroxy-L-threonine                                                               | C06056 | METPA0747   | NA      | 28330  | NA   |
| <b>Lysine degradation</b>                                                           |        |             |         |        |      |
| Oxoadipic acid                                                                      | C00322 | HMDB0000225 | 71      | 15753  | 5234 |
| Saccharopine                                                                        | C00449 | HMDB0000279 | 160556  | 16927  | 383  |
| Amino adipic acid                                                                   | C00956 | HMDB0000510 | 469     | 37024  | 5496 |
| <b>L-leucine biosynthesis</b>                                                       |        |             |         |        |      |
| Isopropylmalate                                                                     | C02631 | HMDB0012241 | 5280533 | 17275  | NA   |
| L-2-Amino adipate adenylate                                                         | C05560 | HMDB0006941 | 5,3E+07 | NA     | NA   |
| <b>GABA shunt</b>                                                                   |        |             |         |        |      |
| Gamma-Aminobutyric acid                                                             | C00334 | HMDB0000112 | 223130  | 16865  | NA   |
| <b>Biochemical synthesis of glycosylated proteins and lipids – Chitin synthesis</b> |        |             |         |        |      |
| Glucosamine                                                                         | C00329 | HMDB0001514 | 439213  | 47977  | 266  |
| Glucosamine 6-phosphate                                                             | C00352 | HMDB0001254 | 439217  | 15873  | 6111 |
| N-Acetyl-D-Glucosamine 6-Phosphate                                                  | C00357 | HMDB0001062 | 440996  | 15784  | 5975 |
| Chitin                                                                              | C00461 | HMDB0003362 | 444514  | 71404  | 6903 |
| <b>UMP(uridine-5'-monophosphate) biosynthesis</b>                                   |        |             |         |        |      |
| 4,5-Dihydroxybutyric acid                                                           | C00337 | HMDB0000528 | 648     | 30865  | 5513 |
| <b>Methylxanthine biosynthesis (caffeine/theobromine)</b>                           |        |             |         |        |      |
| Xanthine                                                                            | C00385 | HMDB0000292 | 1188    | 17712  | 82   |
| <b>Porphyry pathway</b>                                                             |        |             |         |        |      |
| 5-Aminolevulinic acid                                                               | C00430 | HMDB0001149 | 137     | 17549  | 6037 |
| Uroporphyrinogen III                                                                | C01051 | HMDB0001086 | 1179    | 15437  | 79   |
| Protoporphyrinogen IX                                                               | C01079 | HMDB0001097 | 121893  | 15435  | 6003 |
| Porphobilinogen                                                                     | C00931 | HMDB0000245 | 1021    | 17381  | 76   |
| Protoporphyrin IX                                                                   | C02191 | HMDB0000241 | NA      | 15430  | 4158 |
| Siroheme                                                                            | C00748 | METPA0076   | NA      | 28599  | NA   |
| Coproporphyrin III                                                                  | C05770 | HMDB0000570 | NA      | 27609  | 5553 |
| Precorrin 2                                                                         | C02463 | METPA0294   | NA      | 50602  | NA   |
| <b>NAD biosynthesis</b>                                                             |        |             |         |        |      |
| Nicotinamide ribotide                                                               | C00455 | HMDB0000229 | 14180   | 16171  | 5238 |
| <b>Transaminations</b>                                                              |        |             |         |        |      |
| Pyridoxamine                                                                        | C00534 | HMDB0001431 | 1052    | 16410  | 238  |
| <b>Multi Pathways</b>                                                               |        |             |         |        |      |
| S-Adenosylhomocysteine                                                              | C00021 | HMDB0000939 | 439155  | 16680  | 296  |
| Oxoglutaric acid                                                                    | C00026 | HMDB0000208 | 51      | 30915  | 5218 |
| 3-methyl pyruvic acid                                                               | C00109 | HMDB0000005 | 58      | 30831  | NA   |
| Alpha-ketoisovaleric acid                                                           | C00141 | HMDB0000019 | 49      | 16530  | 5091 |
| N-Acetyl-D-glucosamine                                                              | C00140 | HMDB0000215 | 439174  | 506227 | 3356 |
| 4-Trimethylammoniumbutanal                                                          | C01149 | HMDB0001345 | 133     | 18020  | 6179 |
| Lauroyl-CoA                                                                         | C01832 | HMDB0003571 | 165436  | 15521  | 6959 |

|                                                              |        |             |         |         |      |
|--------------------------------------------------------------|--------|-------------|---------|---------|------|
| Long-chain acyl-CoA                                          | C02843 | MA3TEM004   | 5783    | 33184   | NA   |
| <b>Sterol pathway</b>                                        |        |             |         |         |      |
| Cholesterol                                                  | C00187 | HMDB0000067 | 5997    | 1307929 | 163  |
| Fecosterol                                                   | C04525 | METPA0507   | NA      | 17038   | NA   |
| <b>Aminobenzoic acid</b>                                     |        |             |         |         |      |
| 2-Aminobenzoic acid                                          | C00108 | HMDB0001123 | 227     | 30754   | 6018 |
| <b>Sugar alcohol pathway</b>                                 |        |             |         |         |      |
| Glycerol                                                     | C00116 | HMDB0000131 | 753     | 17754   | 105  |
| Xylitol                                                      | C00379 | HMDB0002917 | 6912    | 17151   | NA   |
| Mannitol                                                     | C00392 | HMDB0000765 | 6251    | 16899   | 142  |
| <b>Polyamine pathway</b>                                     |        |             |         |         |      |
| Putrescine                                                   | C00134 | HMDB0001414 | 1045    | 17148   | 3226 |
| Aminopropylcadaverine                                        | C16565 | HMDB0012189 | 65523   | 64860   | NA   |
| Spermidine                                                   | C00315 | HMDB0001257 | 1102    | 16610   | 254  |
| <b>Polyamine biosynthesis</b>                                |        |             |         |         |      |
| S-Adenosylmethioninamine                                     | C01137 | HMDB0000988 | 439415  | 15625   | 3501 |
| <b>Coenzyme</b>                                              |        |             |         |         |      |
| Oxidized glutathione                                         | C00127 | HMDB0003337 | 65359   | 17858   | 6893 |
| Niacinamide                                                  | C00153 | HMDB0001406 | 936     | 17154   | 1497 |
| <b>Peptides of nonprotein origin</b>                         |        |             |         |         |      |
| Carnosine                                                    | C00386 | HMDB0000033 | 439224  | 15727   | 38   |
| <b>Oligopeptides pathway</b>                                 |        |             |         |         |      |
| Ophthalmic acid                                              |        |             |         |         |      |
| <b>Putrescine, spermine and spermi-<br/>dine degradation</b> |        |             |         |         |      |
| 4-Aminobutyraldehyde                                         | C00555 |             | NA      | NA      | NA   |
| <b>phospholipid biosynthesis</b>                             |        |             |         |         |      |
| Phosphorylcholine                                            | C00588 | HMDB0001565 | 1014    | 18132   | 6326 |
| <b>L-tryptophan methabolism</b>                              |        |             |         |         |      |
| Indoleacetaldehyde                                           | C00637 | HMDB0001190 | 800     | 18086   | 6068 |
| Cinnavalinate                                                | C05640 | HMDB0004078 | 114918  | NA      | NA   |
| 5-Hydroxy-N-formylkynurenine                                 | C05648 | HMDB0004086 | 440744  | 2065    | NA   |
| <b>sphingolipid biosynthesis</b>                             |        |             |         |         |      |
| Sphinganine                                                  | C00836 | HMDB0000269 | 91486   | 16566   | 5268 |
| <b>pyrimidine deoxyribonucleosides<br/>salvage</b>           |        |             |         |         |      |
| Deoxycytidine                                                | C00881 | HMDB0000014 | 13711   | 15698   | 3367 |
| <b>synthesis of leukotriene</b>                              |        |             |         |         |      |
| Leukotriene A4                                               | C00909 | HMDB0001337 | 5280383 | 15651   | 3449 |
| Leukotriene B4                                               | C02165 | HMDB0001085 | 5283128 | 15647   | 406  |
| <b>dihydrofolate synthesis</b>                               |        |             |         |         |      |
| 7,8-Dihydropteroic acid                                      | C00921 | HMDB0001412 | 170     | 4581    | 6228 |
| <b>formaldehyde oxidation</b>                                |        |             |         |         |      |
| S-Formylglutathione                                          | C01031 | HMDB0001550 | 189122  | 16225   | 3469 |
| <b>gamma amino acids pathway</b>                             |        |             |         |         |      |
| 4-Guanidinobutanoic acid                                     | C01035 | HMDB0003464 | 500     | 15728   | 6938 |
| <b>prosthetic group of several acyl<br/>carrier proteins</b> |        |             |         |         |      |
| Pantetheine 4'-phosphate                                     | C01134 | HMDB0001416 | 987     | 16858   | NA   |
| <b>glycerolipids pathway</b>                                 |        |             |         |         |      |
| Glycerolphosphorylethanolamine                               | C01233 | HMDB0000114 | 123874  | 52330   | 5151 |
| <b>aminoadipic pathway</b>                                   |        |             |         |         |      |
| Homocitric acid                                              | C01251 | HMDB0003518 | 439459  | 52222   | 6943 |

|                                                                 |        |             |         |        |      |
|-----------------------------------------------------------------|--------|-------------|---------|--------|------|
| <b>dipeptide</b>                                                |        |             |         |        |      |
| Anserine                                                        | C01262 | HMDB0000194 | 112072  | 18323  | 5209 |
| <b>lipid-dependent phytate biosynthesis</b>                     |        |             |         |        |      |
| Inositol 1,3,4,5,6-pentakisphosphate                            | C01284 | HMDB0003529 | NA      | 16322  | NA   |
| <b>sphingolipid biosynthesis</b>                                |        |             |         |        |      |
| Ergosterol                                                      | C01694 | HMDB0000878 | 2,2E+07 | 16933  | 5839 |
| <b>γ-glutamyl cycle</b>                                         |        |             |         |        |      |
| Pyroglutamic acid                                               | C01879 | HMDB0000267 | 7405    | 18183  | 3251 |
| <b>thiol metabolism</b>                                         |        |             |         |        |      |
| Trypanothione                                                   | C02090 | HMDB0060520 | 449517  | 17842  | NA   |
| <b>homocysteine and cysteine inter-conversion</b>               |        |             |         |        |      |
| L-Cystathionine                                                 | C02291 | HMDB0000099 | 439258  | 17482  | 39   |
| <b>hydroxy fatty acids pathway</b>                              |        |             |         |        |      |
| 2-Isopropylmalic acid                                           | C02504 | HMDB0000402 | 5280523 | 35128  | 339  |
| <b>pyridine nucleotide cycling</b>                              |        |             |         |        |      |
| Nicotinate D-ribonucleoside                                     | C05841 | HMDB0006809 | 161234  | 27748  | NA   |
| <b>L- arginine degradation</b>                                  |        |             |         |        |      |
| 4-Guanidinobutanamide                                           | C03078 | METPA0359   | NA      | 18062  | NA   |
| <b>5-aminoimidazole ribonucleotide biosynthesis</b>             |        |             |         |        |      |
| 5-Phosphoribosylamine                                           | C03090 | HMDB0001128 | 439905  | 37737  | 6023 |
| <b>cyclic peptides</b>                                          |        |             |         |        |      |
| Trypanothione disulfide                                         | C03170 | HMDB0060521 | 115098  | 35490  | NA   |
| <b>L-tryptophan degradation</b>                                 |        |             |         |        |      |
|                                                                 | C03227 | HMDB0011631 | 11811   | 17380  | NA   |
| <b>L-isoleucine degradation</b>                                 |        |             |         |        |      |
| 2-Methylacetoacetyl-CoA                                         | C03344 | HMDB0001157 | 53      | 15476  | 6040 |
| <b>biosynthesis of purine nucleotides and thiamin.</b>          |        |             |         |        |      |
| 5-Aminoimidazole ribonucleotide                                 | C03373 | HMDB0001235 | 161500  | 138560 | 6097 |
| <b>glutathione-mediated detoxification</b>                      |        |             |         |        |      |
| S-Lactoylglutathione                                            | C03451 | HMDB0001066 | 440018  | 15694  | 5979 |
| <b>coenzyme A biosynthesis</b>                                  |        |             |         |        |      |
| D-4'-Phosphopantothenate                                        | C03492 | HMDB0001016 | 41635   | 15905  | 3427 |
| <b>tricarboxylic acids and derivatives</b>                      |        |             |         |        |      |
| but-1-ene-1,2,4-tricarboxylic acid                              | C04002 | HMDB0060320 | 5280640 | 17516  | NA   |
| <b>carboxamide pathway</b>                                      |        |             |         |        |      |
| 5-Aminoimidazole-4-carboxamide                                  | C04051 | HMDB0003192 | 9679    | 2030   | 629  |
| <b>L-arginine/L-ornithine biosynthesis</b>                      |        |             |         |        |      |
| N-Acetyl-L-glutamyl 5-phosphate                                 | C04133 | HMDB0006456 | 440236  | 16878  | 3396 |
| <b>methionine biosynthesis</b>                                  |        |             |         |        |      |
| 5-Methylthioribose 1-phosphate                                  | C04188 | HMDB0000963 | 5,3E+07 | 27859  | 5909 |
| <b>flavin biosynthesis</b>                                      |        |             |         |        |      |
| 6,7-Dimethyl-8-(1-D-ribityl)lumazine                            | C04332 | HMDB0003826 | 168989  | 17601  | NA   |
| 5-Amino-6-ribitylamino uracil                                   | C04732 | HMDB0011106 | 193516  | 15934  | NA   |
| <b>purine metabolism / conversion of glutamine to glutamate</b> |        |             |         |        |      |

|                                                                |        |             |         |        |      |
|----------------------------------------------------------------|--------|-------------|---------|--------|------|
| N(2)-Formyl-N(1)-(5-phospho-D-riboseyl)glycinamide             | C04376 | HMDB0001308 | 1,6E+07 | NA     | NA   |
| <b>pyrimidine nucleosides pathway</b>                          |        |             |         |        |      |
| 5,10-Methylenetetrahydromethanopterin                          | C04377 | HMDB0060401 | 440314  | 16568  | NA   |
| <b>alpha amino acids pathway</b>                               |        |             |         |        |      |
| 2-Amino-3-carboxymuconic acid semialdehyde                     | C04409 | HMDB0001330 | 5280673 | 995    | 6165 |
| <b>riboflavin metabolism</b>                                   |        |             |         |        |      |
| 5-Amino-6-(5'-phosphoribitylamino)uracil                       | C04454 | HMDB0003841 | 1,9E+07 | 18247  | NA   |
| <b>dehydroquinate biosynthesis</b>                             |        |             |         |        |      |
| 2-Dehydro-3-deoxy-D-arabinoheptonate 7-phosphate               | C04691 | METPA0533   | NA      | 18150  | NA   |
| <b>inosine-5'-phosphate biosynthesis</b>                       |        |             |         |        |      |
| Phosphoribosyl formamidocarboxamide                            | C04734 | HMDB0001439 | 166760  | 18381  | 6247 |
| <b>hydroxyeicosatetraenoic acid</b>                            |        |             |         |        |      |
| 15(S)-HETE                                                     | C04742 | HMDB0003876 | 9966861 | 15558  | NA   |
| <b>purine metabolism</b>                                       |        |             |         |        |      |
| 5-amino-1-(5-phospho-D-riboseyl)imidazole-4-carboxylate        | C04751 | HMDB0006273 | 165388  | 28413  | NA   |
| <b>tetrahydrofolate biosynthesis</b>                           |        |             |         |        |      |
| 7,8-Dihydroneopterin                                           | C04874 | HMDB0002275 | 65074   | 17001  | 6588 |
| <b>sterol biosynthesis</b>                                     |        |             |         |        |      |
| 4,4-Dimethyl-5a-cholesta-8,24-dien-3-b-ol                      | C05108 | HMDB0001286 | 5,1E+07 | 18364  | 6135 |
| <b>histidine metabolism</b>                                    |        |             |         |        |      |
| Imidazole-4-acetaldehyde                                       | C05130 | HMDB0003905 | 150841  | 27398  | NA   |
| <b>lipid metabolism</b>                                        |        |             |         |        |      |
| (2E)-Decenoyl-CoA                                              | C05275 | HMDB0003948 | 5280768 | 10723  | NA   |
| <b>Calvin-Benson-Bassham cycle / pentose phosphate pathway</b> |        |             |         |        |      |
| D-Sedoheptulose 7-phosphate                                    | C05382 | HMDB0001068 | 9,2E+07 | 133983 | 5980 |
| <b>nucleoside pathway</b>                                      |        |             |         |        |      |
| Deoxyinosine                                                   | C05512 | HMDB0000071 | 65058   | 28997  | 3383 |
| <b>catechols pathway</b>                                       |        |             |         |        |      |
| 3,4-Dihydroxyphenylglycol                                      | C05576 | HMDB0000318 | 91528   | 1387   | 5307 |
| 3,4-Dihydroxymandelic acid                                     | C05580 | HMDB0001866 | 85782   | 27637  | 696  |
| <b>phenylalanine metabolism</b>                                |        |             |         |        |      |
| N-Acetyl-D-phenylalanine                                       | C05620 | METPA0627   | NA      | 28203  | NA   |
| <b>indole-3-acetic acid derivative pathway</b>                 |        |             |         |        |      |
| 5-Hydroxyindoleacetic acid                                     | C05635 | HMDB0000763 | 1826    | 27823  | 2975 |
| <b>beta-alanine biosynthesis</b>                               |        |             |         |        |      |
| 3-Aminopropionaldehyde                                         | C05665 | HMDB0001106 | 75      | 18090  | 6007 |
| <b>Eme biosynthesis</b>                                        |        |             |         |        |      |
| Sirohydrochlorin                                               | C05778 | METPA0681   | NA      | 18023  | NA   |
| Heme                                                           | C00032 | HMDB0003178 | 26945   | 17627  | 3680 |
| Heme O                                                         | C15672 | HMDB0001162 | 0       | 24480  | 6044 |
| <b>histamine pathway</b>                                       |        |             |         |        |      |
| Methylimidazoleacetic acid                                     | C05828 | HMDB0002820 | 75810   | 1606   | 3774 |

|                                                                     |        |             |         |       |      |
|---------------------------------------------------------------------|--------|-------------|---------|-------|------|
| <b>polyprenyl diphosphates pathway</b>                              |        |             |         |       |      |
| Dehydrodolichol diphosphate                                         | C05859 | NA          | NA      | NA    | NA   |
| <b>pentose phosphates pathway</b>                                   |        |             |         |       |      |
| 2,5-Diaminopyrimidine nucleoside triphosphate                       | C05923 | HMDB0006821 | 440841  | 929   | NA   |
| <b>metabolism of amino groups</b>                                   |        |             |         |       |      |
| N4-Acetylaminobutanal                                               | C05936 | HMDB0004226 | 440850  | 7386  | NA   |
| <b>sphingolipid biosynthesis</b>                                    |        |             |         |       |      |
| Phytosphingosine                                                    | C12144 | HMDB0004610 | 122121  | 46961 | 7066 |
| <b>glutathione-mediated detoxification</b>                          |        |             |         |       |      |
| S-(Hydroxymethyl)glutathione                                        | C14180 | HMDB0004662 | 447123  | 48926 | 7068 |
| <b>serotonin and melatonin biosynthesis</b>                         |        |             |         |       |      |
| 4a-Hydroxytetrahydrobiopterin                                       | C15522 | HMDB0002281 | 1,4E+08 | 15642 | 6591 |
| <b>sterol biosynthesis</b>                                          |        |             |         |       |      |
| Chenodeoxyglycocholoyl-CoA                                          | C15670 | HMDB0006897 | 440685  | NA    | NA   |
| <b>3-oxo-acyl coas pathway</b>                                      |        |             |         |       |      |
| 3-Oxo-OPC6-CoA                                                      | C16334 | HMDB0060376 | 7,1E+07 | NA    | NA   |
| <b>dipeptides pathway</b>                                           |        |             |         |       |      |
| gamma-L-Glutamyl-L-2-aminobutyrate                                  | C21015 | NA          | 2,5E+08 | NA    | NA   |
| <b>Miscellaneous</b>                                                |        |             |         |       |      |
| 2,5-Diamino-6-(5-phospho-D-ribitylamino)pyrimidin-4(3H)-one Sulfate | C18910 | NA          | 1,2E+08 | 52402 | NA   |
| Ethanolamine                                                        | C00059 | HMDB0001448 | 1117    | 26836 | 3233 |
| Glyceric acid                                                       | C00189 | HMDB0000149 | 700     | 16000 | 3207 |
| Phenylacetaldehyde                                                  | C00258 | HMDB0000139 | 439194  | 32398 | 280  |
| Glycerophosphocholine                                               | C00601 | HMDB0006236 | 998     | 16424 | NA   |
| Diacetyl                                                            | C00670 | HMDB0000086 | 71920   | 16870 | 370  |
| Serotonin                                                           | C00741 | HMDB0003407 | 650     | 16583 | 6921 |
| 4-Amino-5-hydroxymethyl-2-methylpyrimidine                          | C00780 | HMDB0000259 | 5202    | 28790 | 74   |
| 2-Amino-4-hydroxy-6-hydroxymethyl-7,8-dihydropteridine              | C01279 | METPA0166   | NA      | 16892 | NA   |
| 2,5-Diamino-6-(5'-phosphoribosylamino)-4-pyrimidineone              | C01300 | METPA0169   | NA      | 17083 | NA   |
| Melatonin                                                           | C01304 | METPA0171   | NA      | 29114 | NA   |
| Deoxyribose                                                         | C01598 | HMDB0001389 | 896     | 16796 | 73   |
| 2-Oxosuccinamic acid                                                | C01801 | HMDB0003224 | 2,3E+07 | 28816 | 3258 |
| 2-Phenylacetamide                                                   | C02362 | HMDB0060350 | 439716  | 16327 | NA   |
| Indoleglycerol phosphate                                            | C02505 | HMDB0010715 | 7680    | 16562 | NA   |
| PhosphoribosylformiminoAICAR-phosphate                              | C03506 | METPA0401   | NA      | 18299 | NA   |
| Homoisocitrate                                                      | C04896 | HMDB0012277 | 440534  | 18302 | NA   |
| 2S-acetyl-2-hydroxy-butanoic acid                                   | C05662 | METPA0637   | NA      | 15404 | NA   |
| D-erythro-3-Methylmalate                                            | C06006 | HMDB0006900 | 440875  | 27681 | NA   |
| 2-Oxo-3-hydroxy-4-phosphobutanoic acid                              | C06032 | METPA0739   | NA      | 27394 | NA   |
|                                                                     | C06054 | HMDB0006801 | 2,1E+07 | 27951 | NA   |

**Table S2.** List of significance using post-hoc analysis (Fisher's LSD).



| Metabolite name                            | f.value | p.value    | -log10(p) | FDR        | Fisher's LSD                      |
|--------------------------------------------|---------|------------|-----------|------------|-----------------------------------|
| 3-Dehydroquinate                           | 574.38  | 6.9139E-15 | 14.16     | 1.6109E-12 | B - A; C - A; B - C; B - D; C - D |
| 5,10-Methylenetetrahydromethanopterin      | 405.37  | 7.7332E-14 | 13.112    | 9.0091E-12 | D - A; D - B; D - C               |
| gamma-L-Glutamyl-L-2-aminobutyrate         | 244.85  | 2.4947E-12 | 11.603    | 1.9375E-10 | B - A; C - A; D - A; B - C; B - D |
| Siroheme                                   | 196.17  | 1.1374E-11 | 10.944    | 5.6695E-10 | C - A; D - A; C - B; D - B; D - C |
| Biotin                                     | 194.24  | 1.2166E-11 | 10.915    | 5.6695E-10 | A - B; C - A; A - D; C - B; C - D |
| Protoporphyrin IX                          | 180.89  | 1.9772E-11 | 10.704    | 7.678E-10  | B - A; C - A; C - B; B - D; C - D |
| 4-Guanidinobutanamide                      | 146.6   | 8.2418E-11 | 10.084    | 2.7434E-09 | A - B; A - C; D - A; D - B; D - C |
| (2E)-Decenoyl-CoA                          | 141.97  | 1.0241E-10 | 9.9896    | 2.8881E-09 | D - A; D - B; D - C               |
| S-Adenosylhomocysteine                     | 139.77  | 1.1383E-10 | 9.9437    | 2.8881E-09 | A - B; A - C; A - D               |
| Pantothenic acid                           | 138.02  | 1.2395E-10 | 9.9067    | 2.8881E-09 | B - A; C - A; B - D; C - D        |
| Trehalose 6-phosphate                      | 112.65  | 4.8657E-10 | 9.3129    | 1.0306E-08 | D - A; D - B; D - C               |
| Cytidine monophosphate                     | 109.62  | 5.8396E-10 | 9.2336    | 1.1339E-08 | D - A; D - B; D - C               |
| Pyridoxamine 5'-phosphate                  | 107.16  | 6.7973E-10 | 9.1677    | 1.2183E-08 | B - A; C - A; D - A               |
| 15(S)-HETE                                 | 105.54  | 7.5276E-10 | 9.1233    | 1.2528E-08 | B - A; C - A; D - A; B - C; D - C |
| ADP                                        | 94.704  | 1.55E-09   | 8.8097    | 2.4077E-08 | C - A; C - B; C - D               |
| L-Glutamine                                | 93.289  | 1.7132E-09 | 8.7662    | 2.4949E-08 | C - A; A - D; C - B; B - D; C - D |
| N-Acetylglutamic acid                      | 87.072  | 2.7071E-09 | 8.5675    | 3.7103E-08 | A - B; A - D; B - D; C - D        |
| L-Valine                                   | 86.159  | 2.9028E-09 | 8.5372    | 3.7575E-08 | D - A; D - B; D - C               |
| Cholesterol                                | 80.823  | 4.4283E-09 | 8.3538    | 5.4305E-08 | D - A; D - B; D - C               |
| Sucrose                                    | 77.576  | 5.8011E-09 | 8.2365    | 6.6383E-08 | D - A; D - B; D - C               |
| 5-Phosphoribosylamine                      | 77.213  | 5.983E-09  | 8.2231    | 6.6383E-08 | D - A; D - B; D - C               |
| Stachyose                                  | 71.691  | 9.7352E-09 | 8.0117    | 1.0311E-07 | D - A; D - B; D - C               |
| 3-methyl pyruvic acid                      | 67.678  | 1.4184E-08 | 7.8482    | 1.4369E-07 | A - B; A - D; C - B; B - D; C - D |
| Porphobilinogen                            | 62.856  | 2.2938E-08 | 7.6394    | 2.2269E-07 | B - A; C - A; D - A               |
| 4-Amino-5-hydroxymethyl-2-methylpyrimidine | 61.413  | 2.6664E-08 | 7.5741    | 2.4851E-07 | D - A; D - B; D - C               |
| 4-Trimethylammonibutanal                   | 59.031  | 3.4435E-08 | 7.463     | 2.994E-07  | A - B; A - C; A - D               |
| Thiamine pyrophosphate                     | 58.963  | 3.4695E-08 | 7.4597    | 2.994E-07  | D - A; D - B; D - C               |
| SAICAR                                     | 57.683  | 3.9967E-08 | 7.3983    | 3.3258E-07 | B - A; D - A; B - C; D - B; D - C |
| Phosphoribosyl formamidocarboxamide        | 53.313  | 6.629E-08  | 7.1785    | 5.3261E-07 | B - A; C - A; B - D; C - D        |
| but-1-ene-1,2,4-tricarboxylic acid         | 52.289  | 7.5051E-08 | 7.1246    | 5.829E-07  | B - A; C - A; D - A               |
| Gluconic acid                              | 51.425  | 8.3473E-08 | 7.0785    | 6.2739E-07 | A - B; A - C; A - D               |
| 4-Hydroxy-L-threonine                      | 47.79   | 1.3306E-07 | 6.876     | 9.6054E-07 | A - B; A - C; A - D               |
| Farnesol                                   | 47.623  | 1.3604E-07 | 6.8663    | 9.6054E-07 | A - B; A - C; A - D               |
| Pantetheine 4'-phosphate                   | 43.012  | 2.5855E-07 | 6.5874    | 1.7719E-06 | B - A; B - C; B - D               |
| Spermidine                                 | 40.182  | 3.9563E-07 | 6.4027    | 2.5988E-06 | B - A; C - A; B - D; C - D        |
| 2-Aminobenzoic acid                        | 40.015  | 4.0602E-07 | 6.3915    | 2.5988E-06 | A - B; A - D; C - B               |

|                                                        |        |            |        |            |                                   |
|--------------------------------------------------------|--------|------------|--------|------------|-----------------------------------|
| 2-Amino-4-hydroxy-6-hydroxymethyl-7,8-dihydropteridine | 39.91  | 4.1269E-07 | 6.3844 | 2.5988E-06 | C - A; A - D; C - B; B - D; C - D |
| Deoxyinosine                                           | 37.226 | 6.354E-07  | 6.197  | 3.896E-06  | A - D; B - D; C - D               |
| Heme O                                                 | 35.402 | 8.6557E-07 | 6.0627 | 5.075E-06  | B - A; D - A; B - C; D - C        |
| (GlcNAc)2 (Man)3 (PP-Dol)1                             | 35.364 | 8.7124E-07 | 6.0599 | 5.075E-06  | B - A; D - A; B - C; D - C        |
| Citicoline                                             | 35.033 | 9.2299E-07 | 6.0348 | 5.2453E-06 | A - B; A - D; C - B; C - D        |
| 5-Hydroxy-N-formylkynurenine                           | 31.221 | 1.8597E-06 | 5.7306 | 1.0317E-05 | A - B; A - D; C - B; C - D        |
| L-Histidinol phosphate                                 | 31.058 | 1.9191E-06 | 5.7169 | 1.0399E-05 | A - D; B - D; C - D               |
| THF-L-glutamate                                        | 30.928 | 1.9683E-06 | 5.7059 | 1.0423E-05 | A - B; D - A; D - B; D - C        |
| 5-amino-1-(5-phospho-D-ribose)imidazole-4-carboxylate  | 29.478 | 2.6262E-06 | 5.5807 | 1.3598E-05 | A - B; A - C; A - D               |
| Oxoadipic acid                                         | 28.925 | 2.9411E-06 | 5.5315 | 1.4897E-05 | A - B; A - D; C - B; C - D        |
| 5-Methylthioribose 1-phosphate                         | 28.738 | 3.0572E-06 | 5.5147 | 1.5156E-05 | B - A; D - A; D - C               |
| Glycerol                                               | 27.509 | 3.9639E-06 | 5.4019 | 1.9241E-05 | D - A; D - B; D - C               |
| Uracil                                                 | 27.248 | 4.1938E-06 | 5.3774 | 1.9942E-05 | B - A; D - A; D - B; D - C        |
| Oleic acid                                             | 26.499 | 4.9428E-06 | 5.306  | 2.3034E-05 | A - B; A - C; A - D               |
| 4-Amino-4-deoxychorismate                              | 25.609 | 6.0412E-06 | 5.2189 | 2.76E-05   | A - B; A - D; C - B               |
| D-erythro-3-Methylmalate                               | 25.037 | 6.8931E-06 | 5.1616 | 3.0886E-05 | A - D; B - D; C - D               |
| Glucosamine                                            | 23.966 | 8.8889E-06 | 5.0511 | 3.9078E-05 | A - B; A - C; A - D               |
| Gamma-Aminobutyric acid                                | 23.255 | 1.0577E-05 | 4.9756 | 4.5639E-05 | B - A; D - A; D - B               |
| dCMP                                                   | 22.1   | 1.4162E-05 | 4.8489 | 5.9994E-05 | C - A; C - B; C - D               |
| L-Proline                                              | 21.054 | 1.8652E-05 | 4.7293 | 7.7606E-05 | A - D; B - D; C - D               |
| dTDP                                                   | 20.584 | 2.1184E-05 | 4.674  | 8.6594E-05 | A - C; B - C; D - C               |
| Inositol 1,3,4,5,6-pentakisphosphate                   | 20.449 | 2.1985E-05 | 4.6579 | 8.832E-05  | A - B; A - C; A - D               |
| Shikimate 3-phosphate                                  | 20.315 | 2.2808E-05 | 4.6419 | 9.0073E-05 | A - B; A - D                      |
| Docosahexaenoic acid                                   | 20.147 | 2.3898E-05 | 4.6216 | 9.2803E-05 | A - B; A - C; A - D               |
| 8,11,14-Eicosatrienoic acid                            | 19.752 | 2.6697E-05 | 4.5735 | 0.00010091 | A - B; A - C; A - D               |
| Folic acid                                             | 19.731 | 2.6852E-05 | 4.571  | 0.00010091 | C - A; C - D                      |
| 5-Amino-6-ribitylamino uracil                          | 18.937 | 3.374E-05  | 4.4719 | 0.00012478 | A - D; C - B; C - D               |
| Deoxycytidine                                          | 18.824 | 3.4877E-05 | 4.4575 | 0.00012697 | C - A; C - B; C - D               |
| S-Formylglutathione                                    | 17.104 | 5.8882E-05 | 4.23   | 0.00020953 | A - B; A - D                      |
| Glyceric acid                                          | 17.079 | 5.9353E-05 | 4.2266 | 0.00020953 | A - D; B - D; C - D               |
| 4a-Carbinolamine tetrahydrobiopterin                   | 16.921 | 6.2419E-05 | 4.2047 | 0.00021707 | D - A; D - B; D - C               |
| 4-Acetamidobutanoic acid                               | 16.862 | 6.3596E-05 | 4.1966 | 0.00021791 | C - B; D - B                      |
| N-Acetyl-L-glutamate 5-semialdehyde                    | 16.579 | 6.9669E-05 | 4.157  | 0.00023526 | A - B; C - B                      |
| Diacetyl                                               | 16.447 | 7.2713E-05 | 4.1384 | 0.00024203 | B - A; D - A; D - C               |
| Guanosine monophosphate                                | 16.366 | 7.4655E-05 | 4.1269 | 0.00024499 | B - C; D - C                      |
| Glycerophosphocholine                                  | 15.861 | 8.8228E-05 | 4.0544 | 0.00028552 | A - D                             |
| 2S-acetyl-2-hydroxy-butanoic acid                      | 15.747 | 9.1688E-05 | 4.0377 | 0.00029265 | B - D                             |
| Deoxyuridine                                           | 15.364 | 0.00010443 | 3.9812 | 0.00032881 | A - D; B - D                      |
| S-Lactoylglutathione                                   | 14.859 | 0.00012447 | 3.9049 | 0.00038668 | D - A; D - B; D - C               |
| N4-Acetylaminobutanal                                  | 14.533 | 0.00013971 | 3.8548 | 0.00042581 | B - A; D - A                      |
| Trypanothione disulfide                                | 14.513 | 0.00014072 | 3.8517 | 0.00042581 | D - A; D - C                      |
| Shikimic acid                                          | 14.303 | 0.00015177 | 3.8188 | 0.00045337 | A - D                             |
| Phenylacetaldehyde                                     | 14.084 | 0.00016433 | 3.7843 | 0.00048466 | D - A; D - B; D - C               |
| Glucuronic acid                                        | 14.03  | 0.00016763 | 3.7757 | 0.00048822 | A - B; A - C                      |

|                                    |        |            |        |            |                     |
|------------------------------------|--------|------------|--------|------------|---------------------|
| Tetrahydrobiopterin                | 13.908 | 0.0001753  | 3.7562 | 0.00050427 | D - A; D - C        |
| Inosine                            | 13.86  | 0.00017848 | 3.7484 | 0.00050715 | A - D; C - D        |
| Adenine                            | 13.601 | 0.00019657 | 3.7065 | 0.00055182 | D - A               |
| Chitin                             | 13.541 | 0.00020103 | 3.6967 | 0.00055763 | D - A; D - B        |
| L-Asparagine                       | 13.388 | 0.00021303 | 3.6716 | 0.00058395 | D - A; B - C; D - C |
| Nicotinic acid                     | 13.347 | 0.00021633 | 3.6649 | 0.00058611 | A - B               |
| Putrescine                         | 13.105 | 0.00023732 | 3.6247 | 0.00063559 | C - A; C - B        |
| Uridine 5'-monophosphate           | 12.873 | 0.00025969 | 3.5855 | 0.00068759 | B - A; C - A        |
| N-Acetyl-D-glucosamine             | 12.687 | 0.00027936 | 3.5538 | 0.00072589 | B - A; D - A        |
| 5-Hydroxy-L-tryptophan             | 12.678 | 0.00028039 | 3.5522 | 0.00072589 | C - A; C - B; C - D |
| Ornithine                          | 12.604 | 0.00028872 | 3.5395 | 0.00073924 | D - A; D - B        |
| Mannitol                           | 12.434 | 0.00030889 | 3.5102 | 0.0007802  | D - A; D - B; D - C |
| Mevalonic acid-5P                  | 12.414 | 0.00031141 | 3.5067 | 0.0007802  | C - D               |
| 3-Oxo-OPC6-CoA                     | 12.113 | 0.00035167 | 3.4539 | 0.00087011 | A - B; A - C; A - D |
| 5,10-Methylene-THF                 | 12.092 | 0.00035477 | 3.4501 | 0.00087011 | B - A; C - A; D - A |
| Stearic acid                       | 11.99  | 0.0003698  | 3.432  | 0.00089755 | A - C; D - C        |
| N-Acetyl-D-Glucosamine 6-Phosphate | 11.744 | 0.00040943 | 3.3878 | 0.00098347 | B - D; C - D        |

**Table S3.** Correlation matrix between phenolic and flavonoid compounds in *P. columbinus* extracts and antioxidant effects in selected experimental models.

|                  | <i>DPPH</i><br><i>Test</i> | <i>ABTS</i><br><i>Test</i> | <i>Linoleic</i><br><i>Assay</i> | <i>Gallic</i><br><i>acid</i> | <i>Hydroxy-</i><br><i>tyrosol</i> | <i>Catechin</i> | <i>Chloro-</i><br><i>genic acid</i> | <i>Epicate-</i><br><i>chin</i> | <i>Benzoic</i><br><i>acid</i> |
|------------------|----------------------------|----------------------------|---------------------------------|------------------------------|-----------------------------------|-----------------|-------------------------------------|--------------------------------|-------------------------------|
| DPPH Test        | 1                          |                            |                                 |                              |                                   |                 |                                     |                                |                               |
| ABTS Test        | 0,997                      | 1                          |                                 |                              |                                   |                 |                                     |                                |                               |
| Linoleic Assay   | 0,885                      | 0,916                      | 1                               |                              |                                   |                 |                                     |                                |                               |
| Gallic acid      | 0,890                      | 0,920                      | 0,938                           | 1                            |                                   |                 |                                     |                                |                               |
| Hydroxytyrosol   | -0,073                     | 0,002                      | 0,305                           | 0,385                        | 1                                 |                 |                                     |                                |                               |
| Catechin         | -0,106                     | -0,029                     | 0,360                           | 0,282                        | 0,898                             | 1               |                                     |                                |                               |
| Chlorogenic acid | -0,083                     | -0,007                     | 0,292                           | 0,378                        | 1,000                             | 0,890           | 1                                   |                                |                               |
| Epicatechin      | -0,707                     | -0,662                     | -0,465                          | -0,319                       | 0,698                             | 0,529           | 0,709                               | 1                              |                               |
| Benzoic acid     | 0,780                      | 0,740                      | 0,557                           | 0,423                        | -0,619                            | -0,466          | -0,631                              | -0,994                         | 1                             |

Matrix analysis reveal a strong correlation (higher than 89%) of quantitative presence of gallic acid in the extracts and the antioxidant activities. On the other hands antioxidant properties of the extracts are less affected by the presence of other detected flavonoids and phenolics.
